# Supplementary material for: The Complexities of Mixed Families: Transracial Adoption as a Humanitarian Project
Source: MDPI journal article supplement (doi:10.3390/genealogy6020033), 2022-04-29
Supplement: s1 [file s1]

**Table S1. Descriptive Statistics for Participants.**

| <b>Characteristic</b>                       | <b>Number of Participants</b> | <b>Percentage of Participants</b> |
|---------------------------------------------|-------------------------------|-----------------------------------|
| Race                                        |                               |                                   |
| Black                                       | 7                             | 23%                               |
| Latina/o                                    | 4                             | 13%                               |
| Asian                                       | 5                             | 17%                               |
| White                                       | 14                            | 47%                               |
| Location                                    |                               |                                   |
| West                                        | 9                             | 30%                               |
| South                                       | 4                             | 13%                               |
| East                                        | 9                             | 30%                               |
| Midwest                                     | 8                             | 27%                               |
| Adoption Type                               |                               |                                   |
| International                               | 19                            | 63%                               |
| Domestic                                    | 11                            | 37%                               |
| Age of Adopted Family Member<br>at Adoption |                               |                                   |
| Birth to Age 1                              | 10                            | 33%                               |
| Age 1 to Age 4                              | 17                            | 57%                               |
| Age 5 or Above                              | 3                             | 10%                               |
| Note: N=30                                  |                               |                                   |
